# Supplementary material for: Assessment of the structural and functional impact of in-frame mutations of the DMD gene, using the tools included in the eDystrophin online database
Source: PubMed Central journal article supplement (PMC3748829; doi:10.1186/1750-1172-7-45), 2012-07-09

Additional figure S1

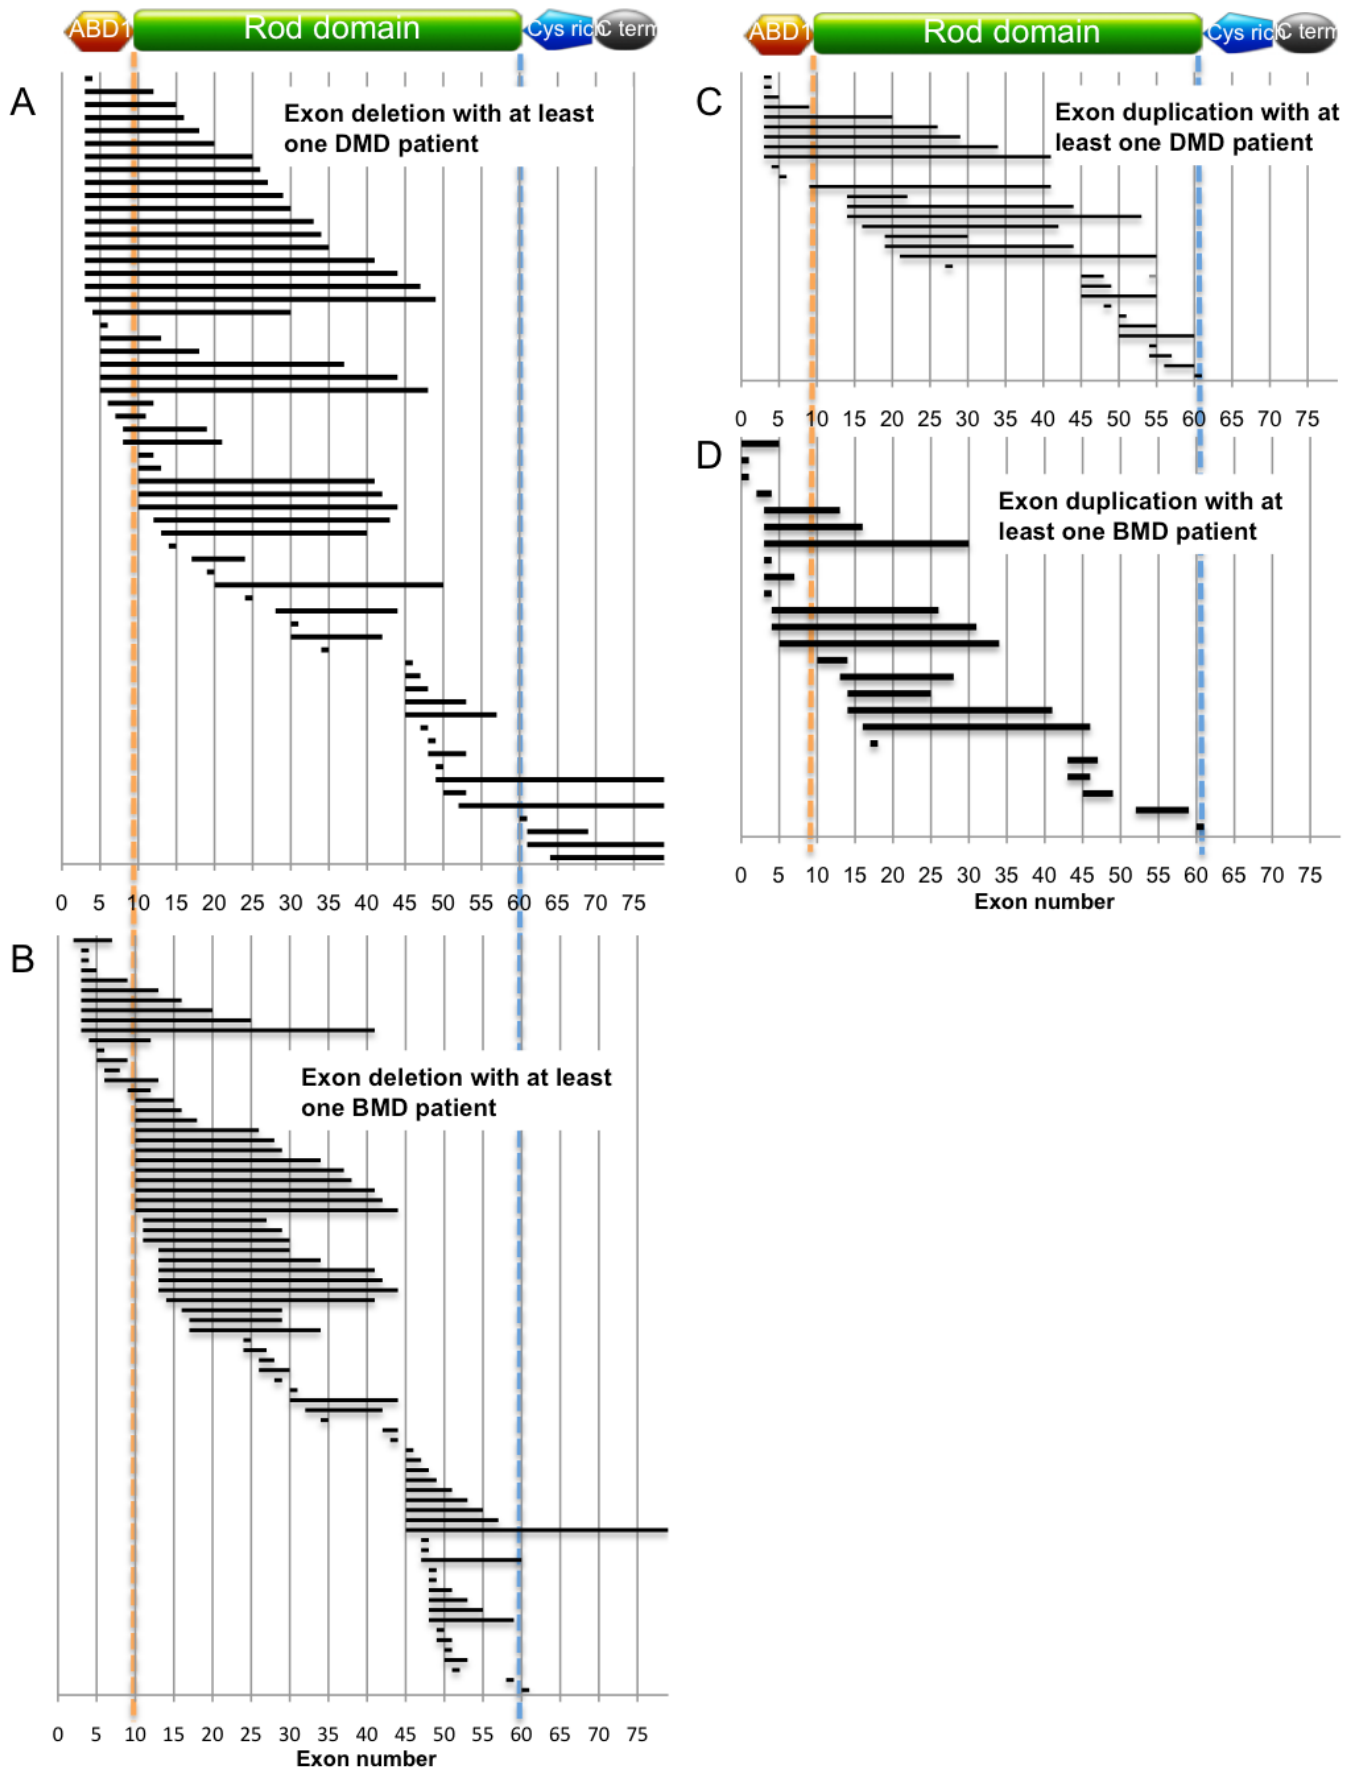

Supplement: 1750-1172-7-45-S3.pdf [file 1750-1172-7-45-S3.pdf]
